# Supplementary material for: Trends and Geographic Availability of Emergency Psychiatric Walk-In and Crisis Services in the United States
Source: Atypon-hosted journal article supplement (doi:10.1176/appi.ps.202000612), 2021-06-15
Supplement: appi.ps.202000612.ds001.pdf [file appi.ps.202000612.ds001.pdf]

Supplemental Table 1: State Variation in Crisis Service Availability in 2018

| State | Mental Health Facilities offering Emergency Psychiatric Walk-In |      |                      | Mental Health Facilities offering Crisis Services |      |                      |
|-------|-----------------------------------------------------------------|------|----------------------|---------------------------------------------------|------|----------------------|
|       | N                                                               | %    | Services per 100,000 | N                                                 | %    | Services per 100,000 |
| AK    | 29                                                              | 43.4 | 5.2                  | 41                                                | 57.4 | 7.4                  |
| AL    | 60                                                              | 43.0 | 1.6                  | 64                                                | 51.9 | 1.7                  |
| AR    | 95                                                              | 48.8 | 4.1                  | 163                                               | 82.7 | 7.1                  |
| AZ    | 79                                                              | 30.8 | 1.4                  | 111                                               | 38.8 | 2.0                  |
| CA    | 185                                                             | 27.0 | .6                   | 375                                               | 50.6 | 1.2                  |
| CO    | 64                                                              | 44.6 | 1.4                  | 114                                               | 80.7 | 2.6                  |
| CT    | 59                                                              | 25.5 | 2.1                  | 90                                                | 39.0 | 3.2                  |
| DC    | 11                                                              | 27.3 | 1.9                  | 14                                                | 38.1 | 2.4                  |
| DE    | 6                                                               | 30.0 | 0.8                  | 10                                                | 38.9 | 1.3                  |
| FL    | 147                                                             | 35.7 | 0.9                  | 139                                               | 38.0 | 0.8                  |
| GA    | 94                                                              | 45.7 | 1.2                  | 83                                                | 42.4 | 1.0                  |
| HI    | 19                                                              | 50.3 | 1.7                  | 19                                                | 53.1 | 1.7                  |
| IA    | 35                                                              | 34.2 | 1.4                  | 54                                                | 36.9 | 2.2                  |
| ID    | 38                                                              | 33.5 | 2.9                  | 66                                                | 55.9 | 5.0                  |
| IL    | 121                                                             | 39.3 | 1.2                  | 200                                               | 64.6 | 2.0                  |
| IN    | 123                                                             | 51.2 | 2.4                  | 157                                               | 61.9 | 3.1                  |
| KS    | 48                                                              | 43.3 | 2.2                  | 68                                                | 67.3 | 3.1                  |
| KY    | 97                                                              | 59.9 | 2.8                  | 132                                               | 75.5 | 3.8                  |
| LA    | 65                                                              | 34.2 | 1.8                  | 81                                                | 47.3 | 2.3                  |
| MA    | 54                                                              | 23.5 | 1.0                  | 71                                                | 31.8 | 1.3                  |
| MD    | 43                                                              | 22.7 | 0.9                  | 77                                                | 34.9 | 1.6                  |
| ME    | 23                                                              | 16.9 | 2.1                  | 29                                                | 24.0 | 2.7                  |
| MI    | 109                                                             | 34.3 | 1.4                  | 153                                               | 46.1 | 2.0                  |
| MN    | 31                                                              | 18.5 | 0.7                  | 68                                                | 40.2 | 1.6                  |
| MO    | 61                                                              | 37.5 | 1.3                  | 110                                               | 66.0 | 2.3                  |
| MS    | 64                                                              | 38.3 | 2.8                  | 99                                                | 63.9 | 4.3                  |
| MT    | 16                                                              | 35.2 | 1.9                  | 33                                                | 57.1 | 4.0                  |
| NC    | 75                                                              | 35.0 | .9                   | 86                                                | 45.5 | 1.1                  |
| ND    | 10                                                              | 39.7 | 1.7                  | 15                                                | 50.8 | 2.6                  |
| NE    | 23                                                              | 23.7 | 1.6                  | 49                                                | 39.9 | 3.4                  |
| NH    | 18                                                              | 44.3 | 1.6                  | 25                                                | 64.2 | 2.3                  |
| NJ    | 45                                                              | 19.5 | 0.6                  | 85                                                | 31.6 | 1.2                  |
| NM    | 25                                                              | 44.4 | 1.5                  | 28                                                | 45.5 | 1.7                  |
| NV    | 23                                                              | 45.7 | 1.0                  | 23                                                | 48.8 | 1.0                  |
| NY    | 250                                                             | 33.4 | 1.6                  | 314                                               | 43.3 | 2.0                  |
| OH    | 119                                                             | 24.2 | 1.3                  | 214                                               | 41.5 | 2.4                  |
| OK    | 71                                                              | 51.8 | 2.4                  | 86                                                | 61.5 | 2.9                  |
| OR    | 35                                                              | 30.8 | 1.1                  | 63                                                | 53.9 | 1.9                  |
| PA    | 119                                                             | 22.6 | 1.2                  | 145                                               | 31.1 | 1.4                  |

|    |     |      |     |     |      |     |
|----|-----|------|-----|-----|------|-----|
| RI | 20  | 51.6 | 2.3 | 22  | 66.5 | 2.6 |
| SC | 64  | 68.2 | 1.6 | 47  | 59.3 | 1.2 |
| SD | 19  | 47.5 | 2.9 | 31  | 73.1 | 4.7 |
| TN | 71  | 30.4 | 1.3 | 124 | 47.2 | 2.4 |
| TX | 160 | 54.8 | 0.8 | 172 | 60.9 | 0.8 |
| UT | 51  | 43.0 | 2.3 | 68  | 48.3 | 3.1 |
| VA | 86  | 37.8 | 1.3 | 130 | 56.2 | 2.0 |
| VT | 22  | 44.8 | 4.3 | 33  | 74.1 | 6.5 |
| WA | 46  | 19.1 | 0.8 | 131 | 45.3 | 2.2 |
| WI | 62  | 16.1 | 1.4 | 117 | 31.4 | 2.6 |
| WV | 56  | 48.2 | 3.9 | 72  | 65.1 | 5.0 |
| WY | 16  | 42.5 | 3.6 | 31  | 73.4 | 7.0 |
